# Supplementary material for: MODMatcher: Multi-Omics Data Matcher for Integrative Genomic Analysis
Source: PLoS Comput Biol. 2014 Aug 14;10(8):e1003790. doi: 10.1371/journal.pcbi.1003790 (PMC4133046; doi:10.1371/journal.pcbi.1003790)
Supplement: Table S1 — Samples of mismatched gender information between clinical annotation and inference from multi-omics data (genotype, mRNA, and methylation profiles). Red ones are mismatched with respect to clinical annotation. (XLSX) [file pcbi.1003790.s005.xlsx]

## Sheet: GenderMismatch
Stable 1. Samples with mismatched gender information between clicnial annotation and inference from multi-omic data. Red ones are mismatches.
index	SampleID	Disease	Gender based on annotation file	Gender inferred from Genotype	Gender inferred from mRNA profiles	Gender inferred from Methylation profiles
1	LT191020	CTRL	2-Female	1-Male	2-Female	1-Male
2	LT121655	CTRL	2-Female	1-Male	2-Female	2-Female
3	LT073436	CTRL	1-Male	2-Female	1-Male	1-Male
4	LT022271	CTRL	2-Female	1-Male	2-Female	2-Female
5	LT013796	COPD	1-Male	2-Female	NA	2-Female
6	LT291449	COPD	1-Male	NA	2-Female	2-Female
7	LT284144	COPD	1-Male	1-Male	1-Male	2-Female
8	LT204017	COPD	2-Female	NA	2-Female	1-Male
9	LT194990	COPD	2-Female	NA	1-Male	1-Male
10	LT193936	COPD	1-Male	2-Female	1-Male	2-Female
11	LT184423	COPD	2-Female	NA	2-Female	1-Male
12	LT184347	COPD	1-Male	NA	1-Male	2-Female
13	LT178967	COPD	2-Female	1-Male	2-Female	1-Male
14	LT178929	COPD	1-Male	2-Female	1-Male	2-Female
15	LT122336	COPD	1-Male	NA	2-Female	2-Female
16	LT075462	COPD	2-Female	NA	1-Male	1-Male
17	LT056627	COPD	1-Male	NA	2-Female	1-Male
18	LT184901	COPD	1-Male	NA	1-Male	2-Female
19	LT112563	COPD	1-Male	1-Male	1-Male	2-Female
20	LT159988	COPD	2-Female	2-Female	2-Female	1-Male
21	LT230415	COPD	2-Female	1-Male	2-Female	NA
