# Supplementary material for: MODMatcher: Multi-Omics Data Matcher for Integrative Genomic Analysis
Source: PLoS Comput Biol. 2014 Aug 14;10(8):e1003790. doi: 10.1371/journal.pcbi.1003790 (PMC4133046; doi:10.1371/journal.pcbi.1003790)
Supplement: Table S3 — Gender inference based on methylation probe intensity in multiple cancer data sets in TCGA. The prediction (Figure S3) is compared with the clinically annotated gender. There are gender mismatched samples in four datasets, COAD, KIRC, LAML, and LUAD. (XLSX) [file pcbi.1003790.s007.xlsx]

## Sheet: Sheet1
Stable 3. Gender inference based on methylation intensity in multiple cancers in TCGA
Cancer Type	Male annotated	Female annotated	Male predicted	Female predicted	mismatched
BRCA	3	340	3	340	0
COAD	98	105	99	104	1
GBM	136	86	136	86	0
KIRC	272	146	271	146	4
LAML	105	89	106	88	1
LUAD	39	50	41	48	2
LUSC	122	39	122	39	0
OV	0	592	0	592	0
PRAD*	192	0	192	0	0
READ	39	32	39	34	0
STAD	55	50	55	50	0
UCEC	0	118	0	118	0
* PRAD is from HM450
