# Supplementary material for: MODMatcher: Multi-Omics Data Matcher for Integrative Genomic Analysis
Source: PLoS Comput Biol. 2014 Aug 14;10(8):e1003790. doi: 10.1371/journal.pcbi.1003790 (PMC4133046; doi:10.1371/journal.pcbi.1003790)
Supplement: Table S5 — Qualities of sample matching results based on MixupMapper and MODMatcher. For the two datasets (Choy CHB+JPT and Choy YRI) where ModMatcher and MixupMapper results were different as shown in Table S4, the numbers of cis-eQTL pairs identified by each alignment method were compared and MODMatcher identified more cis-eQTLs in both dataset. Sample pairs identified in the two data sets by MODMatcher are listed in Tables S6 and S7. (XLSX) [file pcbi.1003790.s009.xlsx]

## Sheet: Sheet1
STable 5 Qualities of sample matching results based on MixupMapper and MODMatcher
5.1 Data set: Choy CHB+JPT, cis-eQTL at FDR 0.01
	Original Mapping	MixupMapper	MODMatcher
aligned sample pairs	86	78	77
number of cis-eQTL identified	367	1494	1907
5.2 Data set: Choy YRI, cis-eQTL at FDR 0.01
	Original Mapping	MixupMapper	MODMatcher
aligned sample pairs	85	83	81
number of cis-eQTL identified	528	597	618
